# Supplementary material for: Multicenter Evaluation of Rapid BACpro® II for the Accurate Identification of Microorganisms Directly from Blood Cultures Using MALDI-TOF MS
Source: MDPI journal article supplement (doi:10.3390/diagnostics11122251), 2021-12-01
Supplement: s1 [file s1]

|     |                    | n   | CHUAC   |      |                |      |         |      |     | n   | CHUV    |     |                |     |         |     |     | n    | HGM     |      |                |      |         |     |      | n  | OUH     |     |                |     |         |     |     |
|-----|--------------------|-----|---------|------|----------------|------|---------|------|-----|-----|---------|-----|----------------|-----|---------|-----|-----|------|---------|------|----------------|------|---------|-----|------|----|---------|-----|----------------|-----|---------|-----|-----|
|     |                    |     | S > 2.0 | (%)  | 1.7 < S < 1.99 | (%)  | S < 1.7 | (%)  | (%) |     | S > 2.0 | (%) | 1.7 < S < 1.99 | (%) | S < 1.7 | (%) | (%) |      | S > 2.0 | (%)  | 1.7 < S < 1.99 | (%)  | S < 1.7 | (%) | (%)  |    | S > 2.0 | (%) | 1.7 < S < 1.99 | (%) | S < 1.7 | (%) | (%) |
| (A) |                    |     |         |      |                |      |         |      |     |     |         |     |                |     |         |     |     |      |         |      |                |      |         |     |      |    |         |     |                |     |         |     |     |
|     | Overall            | 193 | 166     | 86.0 | 21             | 10.9 | 6       | 3.1  | 201 | 179 | 89.0    | 18  | 9.0            | 4   | 2.0     | 177 | 118 | 66.7 | 43      | 24.3 | 16             | 9.0  | 190     | 146 | 76.8 | 28 | 14.8    | 16  | 8.4            |     |         |     |     |
|     | Gram-Negative (GN) | 84  | 81      | 96.4 | 3              | 3.6  | 0       | 0    | 91  | 88  | 96.7    | 2   | 2.2            | 1   | 1.1     | 81  | 66  | 81.5 | 13      | 16.0 | 2              | 2.5  | 67      | 63  | 94.0 | 2  | 3.0     | 2   | 3.0            |     |         |     |     |
|     | Gram-Positive (GP) | 103 | 82      | 79.6 | 18             | 17.5 | 3       | 2.9  | 104 | 87  | 83.6    | 14  | 13.5           | 3   | 2.9     | 88  | 51  | 58.0 | 28      | 31.8 | 9              | 10.2 | 122     | 81  | 67.2 | 27 | 21.3    | 14  | 11.5           |     |         |     |     |
| (B) |                    |     |         |      |                |      |         |      |     |     |         |     |                |     |         |     |     |      |         |      |                |      |         |     |      |    |         |     |                |     |         |     |     |
|     | Enterobacteriales  | 74  | 71      | 95.9 | 3              | 4.1  | 0       | 0    | 77  | 75  | 97.4    | 1   | 1.3            | 1   | 1.3     | 69  | 58  | 84.1 | 10      | 14.5 | 1              | 1.4  | 51      | 50  | 98.0 | 1  | 2.0     | 0   | 0              |     |         |     |     |
|     | Escherichia coli   | 41  | 41      | 100  | 0              | 0    | 0       | 0    | 37  | 36  | 97.3    | 1   | 2.7            | 0   | 0       | 35  | 28  | 80.0 | 6       | 17.1 | 1              | 2.9  | 36      | 34  | 94.4 | 2  | 5.6     | 0   | 0              |     |         |     |     |
|     | Klebsiella spp.    | 19  | 18      | 94.7 | 1              | 5.3  | 0       | 0    | 27  | 27  | 100     | 0   | 0              | 0   | 0       | 15  | 14  | 93.3 | 1       | 6.7  | 0              | 0    | 9       | 9   | 100  | 0  | 0       | 0   | 0              |     |         |     |     |
|     | Pseudomonas        | 4   | 4       | 100  | 0              | 0    | 0       | 0    | 5   | 5   | 100     | 0   | 0              | 0   | 0       | 4   | 4   | 100  | 0       | 0    | 0              | 0    | 2       | 2   | 100  | 0  | 0       | 0   | 0              |     |         |     |     |
|     | Other GN           | 4   | 4       | 100  | 0              | 0    | 0       | 0    | 9   | 8   | 88.9    | 1   | 11.1           | 0   | 0       | 8   | 4   | 50.0 | 3       | 37.5 | 1              | 12.5 | 16      | 13  | 81.2 | 1  | 6.3     | 2   | 12.5           |     |         |     |     |
|     | S. aureus          | 28  | 28      | 100  | 0              | 0    | 0       | 0    | 20  | 20  | 100     | 0   | 0              | 0   | 0       | 12  | 11  | 91.7 | 1       | 8.3  | 0              | 0    | 35      | 31  | 88.6 | 1  | 2.8     | 3   | 8.6            |     |         |     |     |
|     | CoN staphylococci  | 44  | 29      | 65.9 | 14             | 31.8 | 1       | 2.3  | 35  | 25  | 71.4    | 9   | 25.7           | 1   | 2.9     | 27  | 16  | 59.3 | 11      | 40.7 | 0              | 0    | 47      | 21  | 44.7 | 19 | 40.4    | 7   | 14.9           |     |         |     |     |
|     | Streptococci       | 15  | 12      | 80.0 | 1              | 6.7  | 2       | 13.3 | 19  | 18  | 94.7    | 1   | 5.3            | 0   | 0       | 30  | 11  | 36.7 | 11      | 36.7 | 8              | 26.6 | 22      | 16  | 72.8 | 3  | 13.6    | 3   | 13.6           |     |         |     |     |
|     | Enterococci        | 5   | 5       | 100  | 0              | 0    | 0       | 0    | 7   | 7   | 100     | 0   | 0              | 0   | 0       | 12  | 11  | 91.7 | 1       | 8.3  | 0              | 0    | 13      | 13  | 100  | 0  | 0       | 0   | 0              |     |         |     |     |
|     | Other GP           | 11  | 9       | 81.8 | 2              | 18.2 | 0       | 0    | 23  | 17  | 73.9    | 4   | 17.4           | 2   | 8.7     | 7   | 2   | 28.6 | 4       | 57.1 | 1              | 14.3 | 5       | 0   | 0    | 4  | 80.0    | 1   | 20.0           |     |         |     |     |
|     | Yeast              | 6   | 3       | 50.0 | 0              | 0    | 3       | 50.0 | 6   | 4   | 66.7    | 2   | 33.3           | 0   | 0       | 8   | 1   | 12.5 | 2       | 25.0 | 5              | 62.5 | 1       | 1   | 100  | 0  | 0       | 0   | 0              |     |         |     |     |

Tabla S1. Performance of the rapid BACpro® II kit in the 4 participant laboratories.

|                                                                                             | Laboratory | rapidBACpro® II kit                           | Score       | Sepsityper® kit                    | Score       | Differential Centrifugation Method       | Score       |
|---------------------------------------------------------------------------------------------|------------|-----------------------------------------------|-------------|------------------------------------|-------------|------------------------------------------|-------------|
| <i>Staphylococcus aureus</i> + <i>Enterococcus faecium</i>                                  | OUH        | <i>E. faecium</i>                             | 2,21        | <i>S.aureus</i> - <i>E.faecium</i> | 1,98 - 1,75 | -                                        | -           |
| <i>Capnocytophaga sputigena</i> + <i>Fusobacterium nucleatum</i>                            | OUH        | none                                          | -           | none                               | -           | -                                        | -           |
| <i>Enterobacter cloacae</i> + <i>Streptococcus cristatus</i>                                | CHUAC      | <i>E. cloacae</i>                             |             | <i>S. cristatus</i>                |             | -                                        | -           |
| <i>Staphylococcus capitis</i> + <i>Staphylococcus hominis</i>                               | CHUAC      | <i>S. capitis</i>                             |             | none                               |             | -                                        | -           |
| <i>Klebsiella pneumoniae</i> + <i>Enterococcus faecium</i> + <i>Clostridium perfringens</i> | HGM        | <i>K. pneumoniae</i>                          | 2,36        | <i>K. pneumoniae</i>               | 2,38        | <i>K. pneumoniae</i>                     | 2,16        |
| <i>Klebsiella pneumoniae</i> + <i>Enterococcus faecium</i> + <i>Aeromonas hydrophila</i>    | HGM        | <i>A. hydrophila</i>                          | 2,08        | <i>A. hydrophila</i>               | 2,24        | <i>E. faecium</i> + <i>A. hydrophila</i> | 1,69 - 1,81 |
| <i>Staphylococcus aureus</i> + <i>Staphylococcus epidermidis</i>                            | HGM        | <i>S. aureus</i>                              | 2,27        | <i>S. aureus</i>                   | 2,38        | <i>S. aureus</i>                         | 1,46        |
| <i>Staphylococcus aureus</i> + <i>Streptococcus mitis</i>                                   | HGM        | none                                          | -           | none                               | -           | none                                     | -           |
| <i>Serratia marcescens</i> + <i>Enterococcus faecium</i>                                    | HGM        | <i>E. faecium</i>                             | 2,31        | <i>E. faecium</i>                  | 2,36        | <i>E. faecium</i>                        | 1,76        |
| <i>Streptococcus parasanguinis</i> + <i>Neisseria</i> sp.                                   | HGM        | <i>S. parasanguinis</i>                       | 1,85        | <i>S. parasanguinis</i>            | 1,97        | <i>S. parasanguinis</i>                  | -           |
| <i>Acinetobacter baumannii</i> + <i>Staphylococcus epidermidis</i>                          | HGM        | <i>A. baumannii</i>                           | 2,17        | none                               | -           | <i>A. baumannii</i>                      | 2,33        |
| <i>Klebsiella pneumoniae</i> + <i>Serratia marcescens</i>                                   | HGM        | <i>K. pneumoniae</i>                          | 2,26        | <i>K. pneumoniae</i>               | 2,30        | <i>K. pneumoniae</i>                     | 2,40        |
| <i>Escherichia coli</i> + <i>Serratia marcescens</i>                                        | HGM        | <i>E. coli</i>                                | 2,10        | <i>E. coli</i>                     | 2,26        | <i>E. coli</i>                           | 2,02        |
| <i>Staphylococcus epidermidis</i> + <i>Staphylococcus capitis</i>                           | HGM        | <i>S. capitis</i>                             | 1,93        | <i>S. capitis</i>                  | 1,81        | <i>S. capitis</i>                        | 2,23        |
| <i>Staphylococcus epidermidis</i> + <i>Clostridium perfringens</i>                          | HGM        | <i>C. perfringens</i>                         | 2,03        | <i>C. perfringens</i>              | 2,02        | <i>C. perfringens</i>                    | 1,96        |
| <i>Klebsiella pneumoniae</i> + <i>Enterococcus faecalis</i>                                 | HGM        | <i>K. pneumoniae</i>                          | 2,55        | <i>K. pneumoniae</i>               | 2,26        | <i>K. pneumoniae</i>                     | 2,45        |
| <i>Klebsiella pneumoniae</i> + <i>Enterococcus faecalis</i>                                 | HGM        | <i>K. pneumoniae</i>                          | 2,20        | <i>K. pneumoniae</i>               | 2,26        | <i>K. pneumoniae</i>                     | 2,29        |
| <i>Escherichia coli</i> + <i>Enterococcus faecium</i>                                       | HGM        | <i>E. coli</i>                                | 1,67        | <i>E. coli</i>                     | 2,47        | <i>E. coli</i>                           | 2,13        |
| <i>Enterococcus faecalis</i> + <i>Pseudomonas aeruginosa</i>                                | HGM        | <i>E. faecalis</i>                            | 2,23        | <i>E. faecalis</i>                 | 2,21        | <i>E. faecalis</i>                       | 2,20        |
| <i>Enterococcus faecium</i> + <i>Staphylococcus epidermidis</i>                             | HGM        | <i>E. faecium</i>                             | 2,17        | <i>E. faecium</i>                  | 2,34        | <i>E. faecium</i>                        | 2,39        |
| <i>Klebsiella pneumoniae</i> + <i>Bacillus</i> sp.                                          | HGM        | <i>K. pneumoniae</i>                          | 2,20        | <i>K. pneumoniae</i>               | 2,45        | <i>K. pneumoniae</i>                     | 2,25        |
| <i>Klebsiella pneumoniae</i> + <i>Bacillus</i> sp.                                          | HGM        | <i>K. pneumoniae</i>                          | 2,17        | <i>K. pneumoniae</i>               | 2,28        | <i>K. pneumoniae</i>                     | 2,08        |
| <i>Staphylococcus epidermidis</i> + <i>Staphylococcus capitis</i>                           | HGM        | <i>S. epidermidis</i> - <i>S. capitis</i>     | 2,08 - 1,77 | <i>S. epidermidis</i>              | 1,85        | none                                     | -           |
| <i>Escherichia coli</i> + <i>Enterococcus faecalis</i>                                      | HGM        | <i>E. coli</i>                                | 2,30        | <i>E. coli</i>                     | 2,25        | <i>E. coli</i>                           | 2,25        |
| <i>Klebsiella pneumoniae</i> + <i>Staphylococcus haemolyticus</i>                           | HGM        | <i>K. pneumoniae</i> - <i>S. haemolyticus</i> | 1,87 - 1,85 | <i>S. haemolyticus</i>             | 2,14        | <i>S. haemolyticus</i>                   | 1,71        |
| <i>Enterococcus faecalis</i> + <i>Staphylococcus epidermidis</i>                            | HGM        | <i>E. faecalis</i>                            | 1,75        | <i>E. faecalis</i>                 | 2,27        | <i>E. faecalis</i>                       | 2,25        |
| <i>Staphylococcus epidermidis</i> + <i>Streptococcus oralis</i>                             | HGM        | <i>S. oralis</i>                              | 2,07        | <i>S. oralis</i>                   | 2,25        | none                                     | -           |

Table S2. Identification of the polymicrobial blood cultures with different methods.
